# Supplementary material for: High-aspect-ratio photoresist nanopillar arrays with broadband near-perfect optical absorption performance using PDMS-assisted colloidal lithography
Source: Royal Society of Chemistry journal article supplement (doi:10.1039/d5tc00296f), 2025-01-01
Supplement: d5tc00296f1.pdf [file d5tc00296f1.pdf]

## Supporting Information

### High-aspect-ratio Photoresist Nanopillar Arrays with Broadband Near-perfect Optical Absorption Performance Using PDMS- Assisted Colloidal Lithography

Yuting Zhang,<sup>a</sup> Zhengjie Guo,<sup>a</sup> Gaoxiao Li,<sup>a</sup> Ming Fu,<sup>a,\*</sup> Xiaoyu Liu,<sup>a</sup> Jiefeng Li,<sup>a</sup> Chenhui Wei,<sup>a</sup> Zheli Wu,<sup>a</sup> Yuanhao Liu,<sup>a</sup> Peixin Chu,<sup>a</sup> Dawei He,<sup>a</sup> Yongsheng Wang<sup>a</sup>

<sup>a</sup> Key Laboratory of Luminescence and Optical Information, Ministry of Education, Institute of Optoelectronic Technology, Beijing Jiaotong University, 100044 Beijing, P. R. China.

Corresponding author:

Ming Fu <sup>a,\*</sup> Email: mfu@bjtu.edu.cn

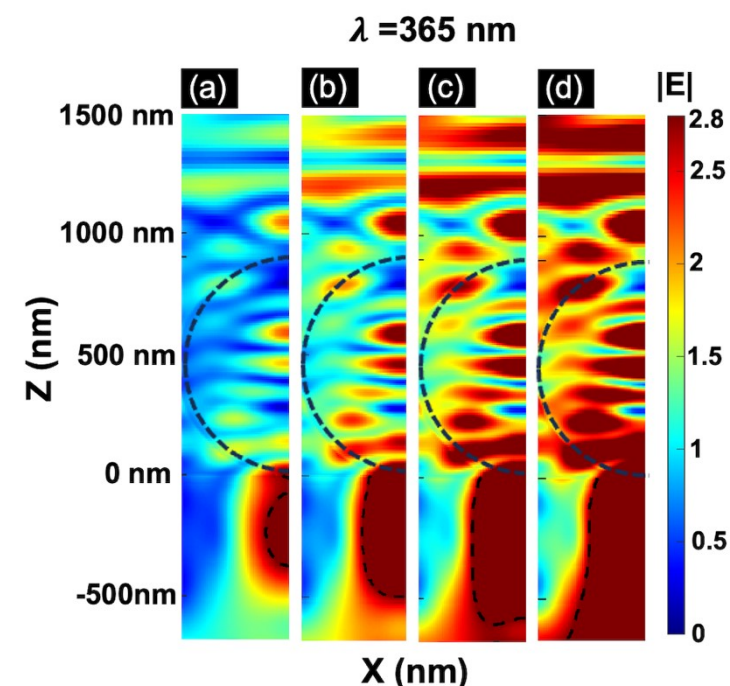

**Figure S1a-d.** Electric field distributions showing the region above the threshold for effective exposure under ultraviolet light source with different light intensity of (a)1, (b)1.5, (c)2, (d)2.5 times of the original light intensity. The dashed line showing the edge of effective exposure region when the electric field intensity of 2.8 times of the origin light source is considered as the threshold.
